# Supplementary material
Source: PubMed Central journal article supplement (PMC5528555)
Supplement: MOL2-8-378-s001.pdf [file MOL2-8-378-s001.pdf]

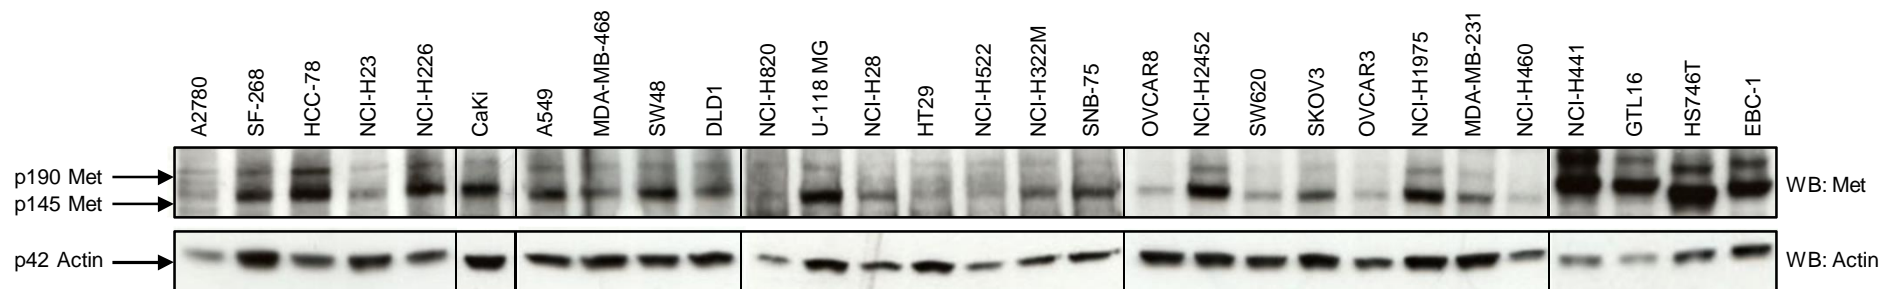

**Supplementary Figure 1** MET expression levels in the panel of human cancer cell lines used to conduct a multi-arm trial.

Proteins were extracted from all cell lines listed in Supplementary Table 1. Total extracts were separated on SDS PAGE gels and MET protein levels were checked by probing the membranes with anti MET antibody. Actin was used as a control for equal protein loading. The cell lines tested proved to express different amount of receptors. As expected, MET-addicted cells (GTL16, HS746T and EBC1) - which harbor high grade *MET* gene amplification - expressed the highest amount of MET protein. It should be noted that also NCI-H441 displayed high levels of MET expression. However, these cells do not harbor increased *MET* copy number and, accordingly, do not experience reduction of their viability when treated with MET-specific inhibitors (McDermott et al. Proc Natl Acad Sci U S A 104, 19936-19941, 2007). NCI-H441 cells therefore are NOT MET-addicted cells.

Cells were lysed and proteins separated on SDS PAGE gels (7.5%) as total extracts. MET protein level was checked probing the membranes with anti
