# Supplementary material
Source: PubMed Central journal article supplement (PMC5528555)
Supplement: MOL2-8-378-s002.pdf [file MOL2-8-378-s002.pdf]

| Cell line  | Hystotype                         |
|------------|-----------------------------------|
| NCI-H820   | Lung Papillary Adenocarcinoma     |
| NCI-H441   | Lung Papillary Adenocarcinoma     |
| NCI-H1975  | Non-Small Cell Lung Cancer        |
| NCI-H23    | Non-Small Cell Lung Cancer        |
| NCI-H522   | Non-Small Cell Lung Cancer        |
| HCC-78     | Non-Small Cell Lung Cancer        |
| EBC-1      | Non-Small Cell Lung Cancer        |
| NCI-H460   | Non-Small Cell Lung Cancer        |
| NCI-H322M  | Bronchio-alveolar Carcinoma       |
| NCI-H226   | Mesothelioma                      |
| NCI-H2452  | Mesothelioma                      |
| NCI-H28    | Mesothelioma                      |
| A549       | Lung Adenocarcinoma               |
| MDA-MB-231 | Breast Adenocarcinoma             |
| MDA-MB-468 | Breast Adenocarcinoma             |
| A2780      | Ovarian Adenocarcinoma            |
| OVCAR8     | Ovarian Adenocarcinoma            |
| OVCAR3     | Ovarian Adenocarcinoma            |
| SKOV3      | Ovarian Adenocarcinoma            |
| HT29       | Rectosigmoid Colon Adenocarcinoma |
| SW620      | Colorectal Adenocarcinoma         |
| SW48       | Colorectal Adenocarcinoma         |
| DLD1       | Colorectal Adenocarcinoma         |
| SF-268     | Glioblastoma                      |
| U-118 MG   | Glioblastoma                      |
| SNB-75     | Glioblastoma                      |
| CaKi       | Kidney Carcinoma                  |
| HS746T     | Gastric Adenocarcinoma            |
| GTL16      | Gastric Adenocarcinoma            |

**Supplementary table 1** Listed the human cancer-derived cell lines representing diverse tumor types used in the ~~in~~ cell trial
