# Supplementary material
Source: PubMed Central journal article supplement (PMC5528555)
Supplement: MOL2-8-378-s003.pdf [file MOL2-8-378-s003.pdf]

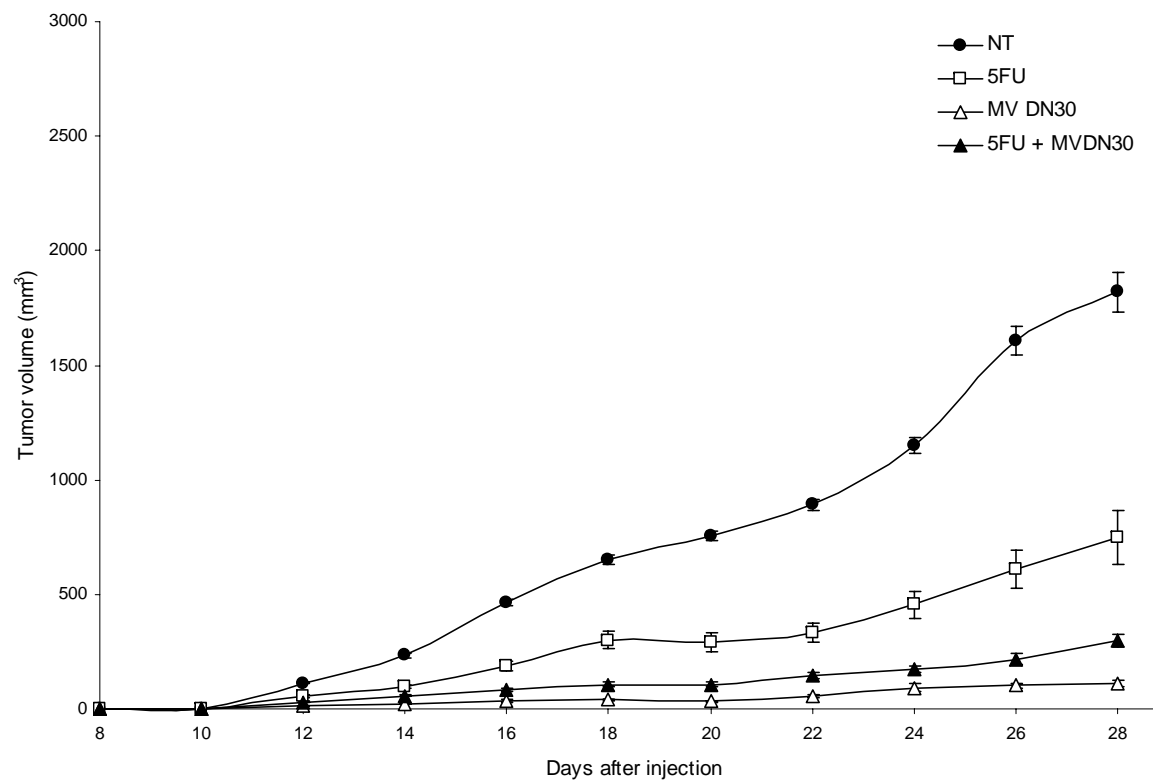

**Supplementary Figure 2** Effect of MV-DN30 and 5FU as single agents and in combination on growth of tumor xenografts.

EBC-1 cells were injected subcutaneously on the right flanks of immunocompromised mice to induce the formation of experimental tumors. When tumors volume was approximately 50 mm<sup>3</sup> mice were randomized in four arms (n=6) and treated as follow: (i) placebo; (ii) MV-DN30 (20 µg/mice); (iii) 5FU (150 µg/mice) and (iv) MV-DN30 + CDDP (20 and 150 µg/mice respectively). Mice were treated three times per week for two months and tumors volume measured at the indicated days using a calliper. Values represent the mean tumor volume of each experimental group and error bars report standard errors.
